# Supplementary material for: Context-dependent requirement of G protein coupling for Latrophilin-2 in target selection of hippocampal axons
Source: eLife journal article supplement (doi:10.7554/elife.83529), 2023-03-20
Supplement: fig1-data1 [file Figure 1 - Source 1.xlsx]

## Sheet: Cre
		Proximal
		1	2	3	4	5	6	7	8	9	10	11	12	13	14	15	16	17	18	19	20	21	22	23	24	25	26	27	28	29	30	31	32	33	34	35	36	37	38	39	40	41	42	43	44	45	46	47	48
	Animal 1	44.1056	49.6403	49.3712	49.7636	49.9339	49.7724	49.6616	50.5196	50.8344	50.5886	50.6653	51.6988	51.4615	52.015	52.2453	52.8528	53.6103	53.6316	54.6163	55.4811	56.2957	56.8955	57.5202	57.8123	58.4894	60.0488	61.5188	63.2746	64.899	65.536	67.1859	67.9828	70.0049	73.2355	75.0867	79.745	83.1571	86.0907	90.6484	91.1632	92.8781	98.1529	102.727	106.12	110.483	115.058	119.018	125.515
	Animal 2	31.6265	31.2221	29.9902	30.2275	31.008	32.3101	32.6737	34.6914	43.4952	56.255	62.9301	67.6624	69.7092	69.1691	70.5242	73.4657	74.5931	76.0516	78.2613	83.1539	85.9944	90.8757	96.3197	99.7183	101.513	101.347	100.497	102.51	104.093	105.129	106.407	106.935	107.889	111.38	110.054	110.333	111.984	111.056	111.865	109.898	110.374	113.577	113.661	114.006	113.995	116.469	117.904	119.712
	Animal 3	73.0167	73.4974	74.1369	74.6143	75.2446	75.6638	75.4539	76.1124	76.6974	77.5118	78.3188	77.9856	79.5125	80.2107	81.7917	81.2856	81.7155	82.2283	83.5957	83.7781	84.5869	85.1587	85.1245	85.628	86.8734	88.9019	89.283	89.786	90.5406	90.4165	90.5146	90.3253	91.5451	93.5971	94.4854	96.0405	95.8007	96.2927	97.801	100.514	101.307	103.983	103.884	104.897	105.39	106.365	110.623	112.104
	Animal 4	74.8306	75.4588	75.7739	75.802	76.4264	77.6389	78.2811	79.4239	79.2666	80.2069	80.7755	80.9103	81.1712	81.6671	82.9355	82.9316	84.2185	84.2732	85.7192	86.0045	85.4752	85.7367	86.3145	88.3943	88.7749	89.705	93.6864	94.1186	96.4011	96.5541	96.4257	98.3013	99.8869	101.656	102.77	107.793	107.814	108.984	108.114	111.426	114.906	114.606	116.925	117.067	122.393	123.416	126.587	130.509
	Animal 5	30.8235	31.1562	31.1238	31.9533	32.5586	32.9138	33.3612	33.5568	34.1222	34.7962	35.5255	35.4793	35.6997	37.3678	37.6969	37.8286	37.8643	38.8827	39.5383	40.4429	41.0179	41.2303	42.3709	42.8738	42.9293	43.6617	43.8384	44.1104	45.5138	47.578	49.3554	50.4037	51.9022	51.7172	51.7016	51.6522	52.9181	55.0068	58.0353	60.5405	62.1837	63.475	66.212	69.6521	70.9829	71.161	74.4993	80.1975
	Total axon intensity							Fraction of total axon intensity
		Proximal	Mid	Distal					Proximal	Mid	Distal
	Animal 1	1829.93	5499.97	13311				Animal 1	0.0886558	0.26646	0.644884
	Animal 2	2388.25	4277.59	7448.23				Animal 2	0.167422	0.29987	0.522139
	Animal 3	2711.06	4026.57	7448.11				Animal 3	0.191111	0.283846	0.525042
	Animal 4	2803.49	4809.59	9370.01				Animal 4	0.165075	0.283199	0.551726
	Animal 5	1289.48	2938.37	7397.14				Animal 5	0.110348	0.251454	0.633017
[truncated: 52 more columns]

## Sheet: Cre-Lphn2
		Proximal
		1	2	3	4	5	6	7	8	9	10	11	12	13	14	15	16	17	18	19	20	21	22	23	24	25	26	27	28	29	30	31	32	33	34	35	36	37	38	39	40	41	42	43	44	45	46	47	48
	Animal 1	160.276	180.966	203.992	223.752	244.148	261.753	268.291	280.489	302.059	314.948	330.172	337.023	341.077	343.622	349.072	334.092	332.475	332.225	322.569	319.568	308.595	302.187	299.521	283.917	271.375	268.234	264.187	256.275	253.532	242.228	234.075	224.953	218.211	213.297	202.541	198.297	188.531	186.824	188.101	180.646	175.363	169.408	172.081	171.96	165.778	167.185	168.094	165.088
	Animal 2	112.893	114.982	121.468	123.457	127.751	128.758	133.593	135.862	143.443	145.687	146.389	143.883	140.8	145.927	150.639	149.625	148.625	143.872	145.387	147.758	151.852	148.171	150.869	152.306	148.198	140.78	140.658	140.557	137.978	137.482	137.068	133.613	128.459	124.787	124.452	120.43	119.443	119.542	120.299	115.547	111.39	110.375	111.781	107.09	101.958	98.9746	100.726	97.3467
	Animal 3	139.324	146.911	157.15	166.418	171.116	178.667	187.342	185.955	193.567	209.6	206.707	209.815	216.23	226.138	227.723	230.096	225.007	219.731	217.539	219.506	218.227	214.893	220.805	221.23	221.26	215.768	206.229	199.461	191.032	190.97	190.835	185.472	179.046	175.359	168.991	167.346	161.975	153.251	151.268	151.628	147.356	142.875	133.033	128.875	125.523	120.654	119.195	113.175
	Animal 4	65.6897	79.4001	87.0889	101.742	113.853	124.415	139.823	145.994	155.854	163.319	175.713	174.634	176.886	180.253	182.452	187.415	182.944	181.131	179.736	173.352	171.317	167.908	159.693	155.702	149.629	140.147	137.555	127.859	125.883	125.448	121.129	120.286	116.756	106.456	104.418	103.32	97.8895	93.8619	92.9722	90.78	87.2654	86.4313	86.4115	83.8399	79.4348	76.5262	75.9806	71.8036
	Animal 5	173.496	187.909	209.298	217.387	222.584	229.52	232.482	241.985	243.347	252.011	250.916	262.754	269.959	276.526	279.346	285.042	286.171	294.848	296.362	303.839	299.459	296.629	298.15	297.906	296.969	298.854	296.494	288.317	282.177	280.957	277.473	276.073	269.636	262.138	261.138	261.982	255.711	243.556	239.679	232.395	223.724	219.651	209.261	207.484	203.213	193.392	190.981	186.473
	Total axon intensity							Fraction of total axon intensity
		Proximal	Mid	Distal					Proximal	Mid	Distal
	Animal 1	9209.86	5423.01	4022.68				Animal 1	0.493679	0.290692	0.215629
	Animal 2	4598.79	3360.97	2918.83				Animal 2	0.422738	0.308952	0.26831
	Animal 3	6589.77	3821.08	2456.39				Animal 3	0.509156	0.295234	0.189792
	Animal 4	4791.01	2486.27	1737.36				Animal 4	0.526374	0.27316	0.190879
	Animal 5	8774.87	6075.5	3846.61				Animal 5	0.46932	0.324946	0.205734
[truncated: 52 more columns]
