# Supplementary material for: Context-dependent requirement of G protein coupling for Latrophilin-2 in target selection of hippocampal axons
Source: eLife journal article supplement (doi:10.7554/elife.83529), 2023-03-20
Supplement: fig1-figsupp2-data1 [file Figure 1 - figure supplement 2 - source data.xlsx]

## Sheet: Sheet1
		LV-GFP-P2A-Lphn2
		Animal 1	Animal 2	Animal 3	Animal 4	Animal 5	Animal 6	Animal 7	Animal 8	Animal 9	Animal 10	Animal 11	Animal 12	Animal 13	Animal 14	Animal 15
	GFP mean intensity	5929.22	8908.73	7687.14	3365.37	7971.23	5812.9	4948.54	6083.62	4015.33	4763.92	4262.83	4486.61	5649.29	6198.54	4366.49
	FLAG mean intensity	16029.9	26095.8	19625.3	10792.8	11157.5	9110.27	17649.6	19741.2	11362.3	9962.58	9028.03	9655.63	10400.6	14204.6	8354.15
	FLAG/GFP mean intensity	2.70353	2.92924	2.55301	3.20703	1.39972	1.56725	3.56662	3.24497	2.82973	2.09126	2.11785	2.1521	1.84105	2.2916	1.91324
		LV-GFP-P2A-Lphn2_F831A/M835A
		Animal 1	Animal 2	Animal 3	Animal 4	Animal 5	Animal 6	Animal 7	Animal 8	Animal 9	Animal 10
	GFP mean intensity	4140.97	3975.14	4226.32	3818.68	2742.09	3824.28	4284.5	3249.29	4565.28	4293.56
	FLAG mean intensity	6292.35	4629.52	16034.9	12233.3	6311.25	8632.41	10598.2	5332.29	7366.37	14539.6
	FLAG/GFP mean intensity	1.51954	1.16462	3.79405	3.20353	2.30162	2.25727	2.47361	1.64106	1.61356	3.38637
		LV-GFP-P2A-Lphn2_T829G
		Animal 1	Animal 2	Animal 3	Animal 4	Animal 5	Animal 6	Animal 7	Animal 8	Animal 9
	GFP mean intensity	8205.6	4332.83	6250.62	3851.34	4985.2	3893.07	10066.8	7898.92	6355.46
	FLAG mean intensity	37916	14795.4	19958.9	18999.9	4899.29	10787	14079.4	30615.7	11043.7
	FLAG/GFP mean intensity	4.62075	3.41473	3.19311	4.93332	0.982767	2.77082	1.39859	3.87593	1.73767
