# Supplementary material for: Context-dependent requirement of G protein coupling for Latrophilin-2 in target selection of hippocampal axons
Source: eLife journal article supplement (doi:10.7554/elife.83529), 2023-03-20
Supplement: fig3-data2 [file Figure 3 - Source 2.xlsx]

## Sheet: Cre-Lphn2_F831AM835A
		Proximal
		1	2	3	4	5	6	7	8	9	10	11	12	13	14	15	16	17	18	19	20	21	22	23	24	25	26	27	28	29	30	31	32	33	34	35	36	37	38	39	40	41	42	43	44	45	46	47	48
	Animal 1	61.0933	63.041	64.908	68.8568	75.3467	78.8657	76.3039	80.1638	80.6647	84.4984	89.9303	95.3809	96.4397	100.972	108.561	113.349	113.992	117.155	120.561	124.827	125.868	127.804	133.91	142.827	142.066	147.205	143.12	144.83	147.79	142.26	139.78	150.286	148.58	146.818	149.316	154.108	156.35	156.636	159.022	151.096	153.654	157.355	159.43	167.872	167.728	175.294	180.905	176.374
	Animal 2	162.854	175.425	181.881	186.642	185.567	186.076	204.049	214.012	229.125	230.284	243.745	255.198	258.589	277.649	286.429	286.151	293.918	301.429	307.427	310.248	316.319	325.344	330.022	322.418	328.697	332.855	340.528	340.613	352.053	359.8	356.096	356.003	358.026	353.654	339.089	338.352	335.619	329.817	329.533	334.561	344.162	340.825	342.615	340.176	342.402	355.229	354.068	342.563
	Animal 3	30.0516	27.7287	22.0781	21.097	21.4499	22.5937	25.4151	29.6308	38.5418	51.9497	73.6126	80.5827	85.3812	93.9262	97.066	112.141	121.893	125.726	130.069	136.815	142.409	147.968	157.259	160.991	165.74	169.531	180.547	185.197	184.942	184.53	189.932	194.639	191.803	201.796	200.481	201.334	195.809	199.119	197.301	201.03	199.879	207.006	205.074	202.006	203.228	207.406	201.931	203.112
	Animal 4	58.7962	58.7674	55.1928	54.2953	54.5825	56.2147	59.6029	59.5761	61.5564	70.866	82.7921	91.2566	98.1349	103.483	114.38	133.623	159.307	166.613	173.312	180.09	191.301	202.981	204.824	213.984	230.771	231.913	242.746	265.075	271.845	277.438	280.913	283.102	290	295.695	293.529	296.401	304.304	299.291	293.196	294.246	290.103	285.895	281.144	286.585	283.777	279.944	270.351	260.142
	Animal 5	294.195	304.498	322.731	343.899	364.762	379.183	394.714	408.807	428.262	451.491	486.924	497.865	519.574	542.522	548.614	564.591	572.73	587.109	603.331	624.699	654.789	647.741	659.096	677.125	690.319	708.553	728.184	729.194	731.158	734.471	734.243	740.578	732.962	729.967	751.17	748.592	729.428	715.421	731.094	753.17	727.576	710.746	723.169	713.753	712.573	723.552	733.489	741.033
	Animal 6	384.66	402.778	419.839	432.221	439.051	447.709	455.544	476	485.851	487.553	495.74	513.944	515.842	537.072	559.097	566.673	581.633	607.378	625.674	640.175	654.705	671.253	674.719	693.121	706	695.573	699.564	715.421	727.939	711.477	715.817	722.949	735.813	740.691	742.655	734.216	737.698	738.622	726.521	718.519	717.471	713.954	694.092	700.601	693.871	710.661	710.366	733.14
	Total axon intensity							Fraction of total axon intensity
		Proximal	Mid	Distal					Proximal	Mid	Distal
	Animal 1	3651.24	6329.79	9616.52				Animal 1	0.186311	0.322989	0.4907
	Animal 2	9195.47	11672.2	14365.5				Animal 2	0.26099	0.331284	0.407727
	Animal 3	3603.24	6997.05	9337.46				Animal 3	0.180724	0.350945	0.468331
	Animal 4	5079.34	9065.32	8051.29				Animal 4	0.23187	0.413829	0.367539
	Animal 5	18408.9	25139.3	31492.6				Animal 5	0.245319	0.335009	0.419672
	Animal 6	19198.8	24749.5	35398.9				Animal 6	0.241959	0.311914	0.446127
[truncated: 52 more columns]
