# Supplementary material for: Context-dependent requirement of G protein coupling for Latrophilin-2 in target selection of hippocampal axons
Source: eLife journal article supplement (doi:10.7554/elife.83529), 2023-03-20
Supplement: fig4-data2 [file Figure 4 - Source 2.xlsx]

## Sheet: Cre-Lphn2_T829G
		Proximal
		1	2	3	4	5	6	7	8	9	10	11	12	13	14	15	16	17	18	19	20	21	22	23	24	25	26	27	28	29	30	31	32	33	34	35	36	37	38	39	40	41	42	43	44	45	46	47	48
	Animal 1	130.903	133.447	133.421	135.433	136.78	134.119	136.47	140.074	144.569	145.11	148.562	151.031	150.93	154.742	159.88	160.867	165.77	169.532	178.752	180.774	177.694	174.798	181.104	179.151	176.537	179.84	180.718	180.494	178.301	179.872	179.559	177.323	172.353	172.957	174.893	177.806	177.87	179.199	178.382	179.459	173.183	169.875	171.93	172.733	177.69	177.684	177.768	177.599
	Animal 2	102.499	108.732	111.439	119.446	120.186	131.376	127.853	130.621	128.806	129.537	130.697	132.417	132.545	134.501	135.409	136.842	139.414	138.751	136.86	135.694	134.76	135.073	138.59	136.805	140.283	137.459	136.542	142.06	145.227	144.795	147.208	145.522	141.66	135.751	129.28	130.597	136.352	136.575	134.547	134.181	132.114	134.933	134.931	129.764	126.979	127.643	126.461	130.311
	Animal 3	160.805	162.596	161.292	168.039	161.469	161.205	162.002	166.334	163.336	158.576	159.341	155.622	152.658	155.313	156.281	155.5	155.375	149.126	148.436	146.426	145.988	149.012	146.683	143.791	143.27	143.716	137.194	135.446	132.377	132.977	125.598	118.176	119.653	120.086	115.879	113.672	110.113	108.675	105.259	103.661	101.637	100.298	99.3903	95.8743	96.3979	95.8089	92.2814	91.232
	Animal 4	110.81	112.088	118.104	120.363	117.535	124.975	126.859	128.968	131.398	139.218	144.301	148.348	148.563	150.589	153.293	151.218	156.242	157.828	154.88	155.236	153.976	156.996	157.046	154.651	154.839	156.874	158.012	159.478	158.226	151.135	148.852	148.368	145.446	142.884	143.333	140.265	135.96	139.681	139.204	137.655	134.166	132.247	134.094	128.01	125.552	123.045	125.913	124.467
	Animal 5	158.143	175.128	181.159	190.453	201.237	209.236	212.529	218.299	222.853	221.394	218.49	212.986	214.792	217.224	212.502	212.458	207.625	204.163	201.884	194.101	192.643	191.822	189.763	181.082	173.723	170.172	161.763	153.77	146.857	145.954	141.127	137.799	134.838	132.618	128.547	126.574	122.349	118.61	118.726	114.755	110.966	109.579	108.31	105.243	104.576	105.322	101.397	100.048
	Total axon intensity							Fraction of total axon intensity
		Proximal	Mid	Distal					Proximal	Mid	Distal
	Animal 1	5308.91	5718.1	5860.73				Animal 1	0.310919	0.334883	0.343236
	Animal 2	4389.61	4491.83	5672.45				Animal 2	0.298856	0.305815	0.386194
	Animal 3	4933.61	3182.02	3361.28				Animal 3	0.429873	0.277254	0.292873
	Animal 4	4754.71	4344.93	5051.92				Animal 4	0.335985	0.307028	0.356987
	Animal 5	6207.97	3446.99	3541.25				Animal 5	0.470436	0.26121	0.268354
[truncated: 52 more columns]
