# Supplementary material for: Context-dependent requirement of G protein coupling for Latrophilin-2 in target selection of hippocampal axons
Source: eLife journal article supplement (doi:10.7554/elife.83529), 2023-03-20
Supplement: fig5-data1 [file Figure 5 -Source 1.xlsx]

## Sheet: Sheet1
	LV-GFP					LV-GFP-P2A-Lphn2					LV-GFP-P2A-Lphn2_F831A/M835A					LV-GFP-P2A-Lphn2_T829G
	GFP positive	GFP negative	GFP+/GFP-			GFP positive	GFP negative	GFP+/GFP-			GFP positive	GFP negative	GFP+/GFP-			GFP positive	GFP negative	GFP+/GFP-
Animal 1	59.9288	56.9001	1.05323		Animal 1	4.4767	22.7265	0.196981		Animal 1	24.6488	59.5301	0.414056		Animal 1	7.1729	21.644	0.331404
Animal 2	49.5531	45.0401	1.1002		Animal 2	9.251	21.3269	0.433771		Animal 2	15.8028	54.1436	0.291868		Animal 2	3.8852	13.5177	0.287416
Animal 3	49.07	45.6066	1.07594		Animal 3	23.5463	32.9089	0.715499		Animal 3	11.2703	45.2177	0.249245		Animal 3	20.9466	53.6362	0.390531
Animal 4	9.451	22.2472	0.424818		Animal 4	18.7467	42.4464	0.441656		Animal 4	12.3918	58.9498	0.210209		Animal 4	8.7889	17.7878	0.494097
Animal 5	36.7418	41.7831	0.879346		Animal 5	28.1016	53.8725	0.521632		Animal 5	43.1095	46.9083	0.919016		Animal 5	50.5883	72.2184	0.70049
															Animal 6	33.6432	46.21	0.72805
